# Supplementary material
Source: PubMed Central journal article supplement (PMC2838070)

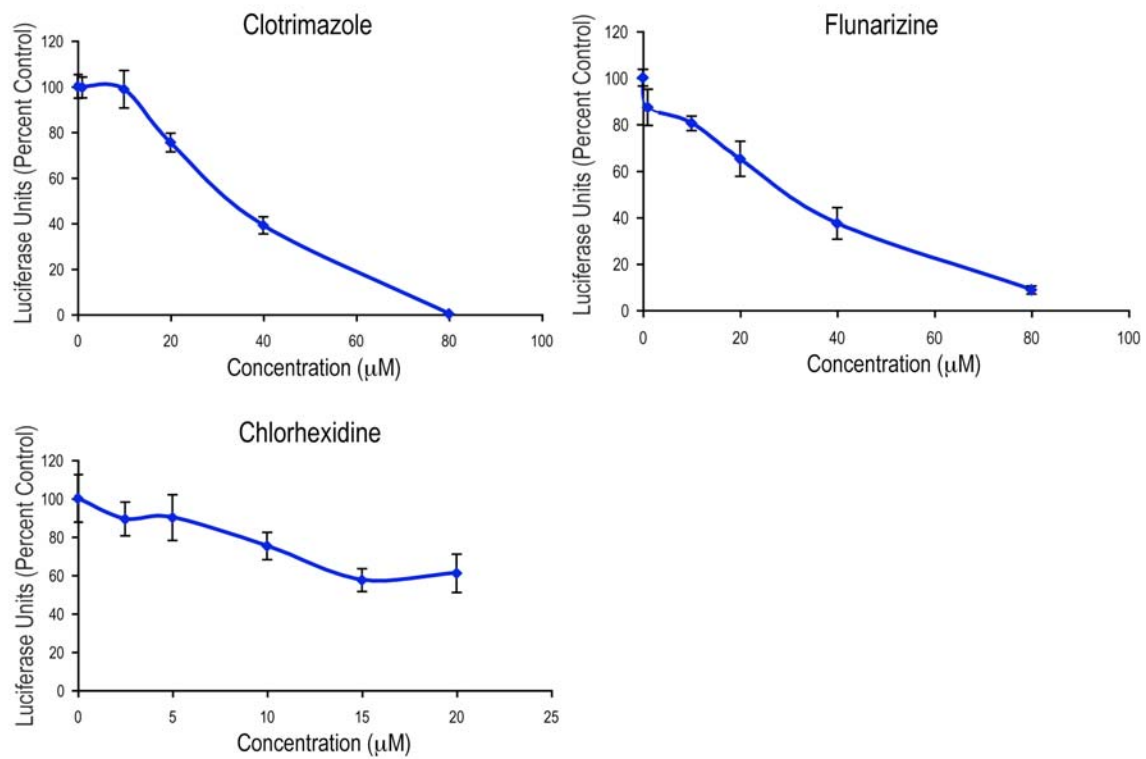

Supplementary Figure 1. Dose response for the splicing modulators. 10000 Luc-I stably expressing cells were treated with DMSO or increasing concentrations of compounds in 96-well plate for 4 hours, followed by luciferase assay.

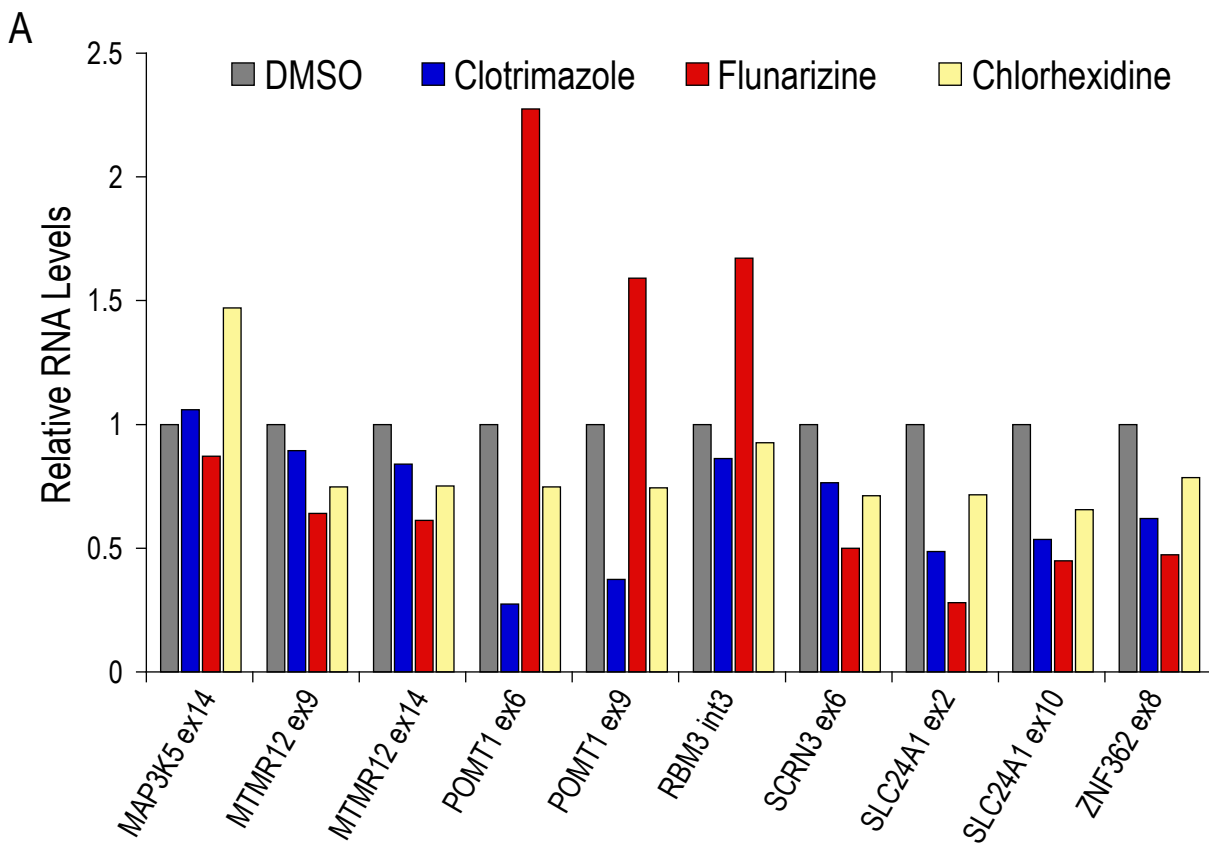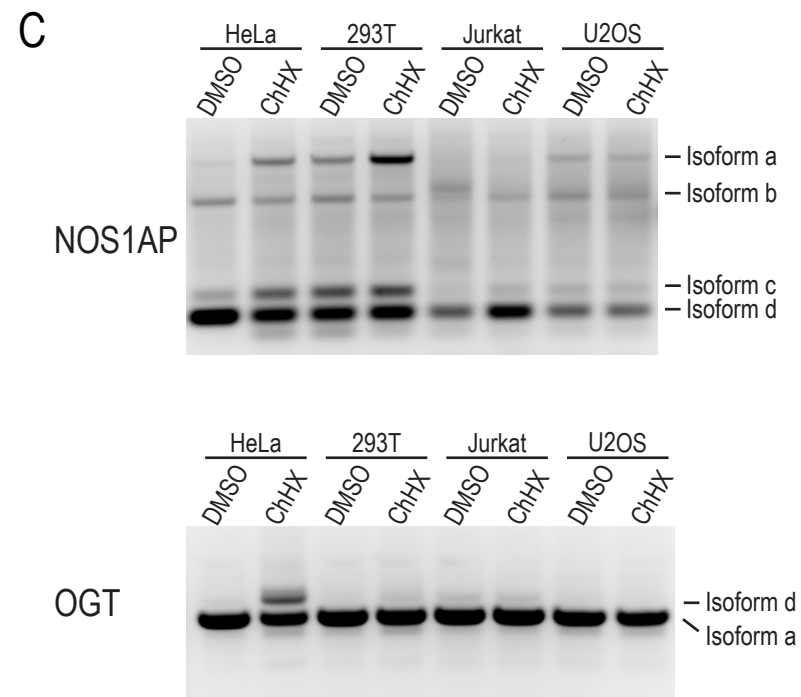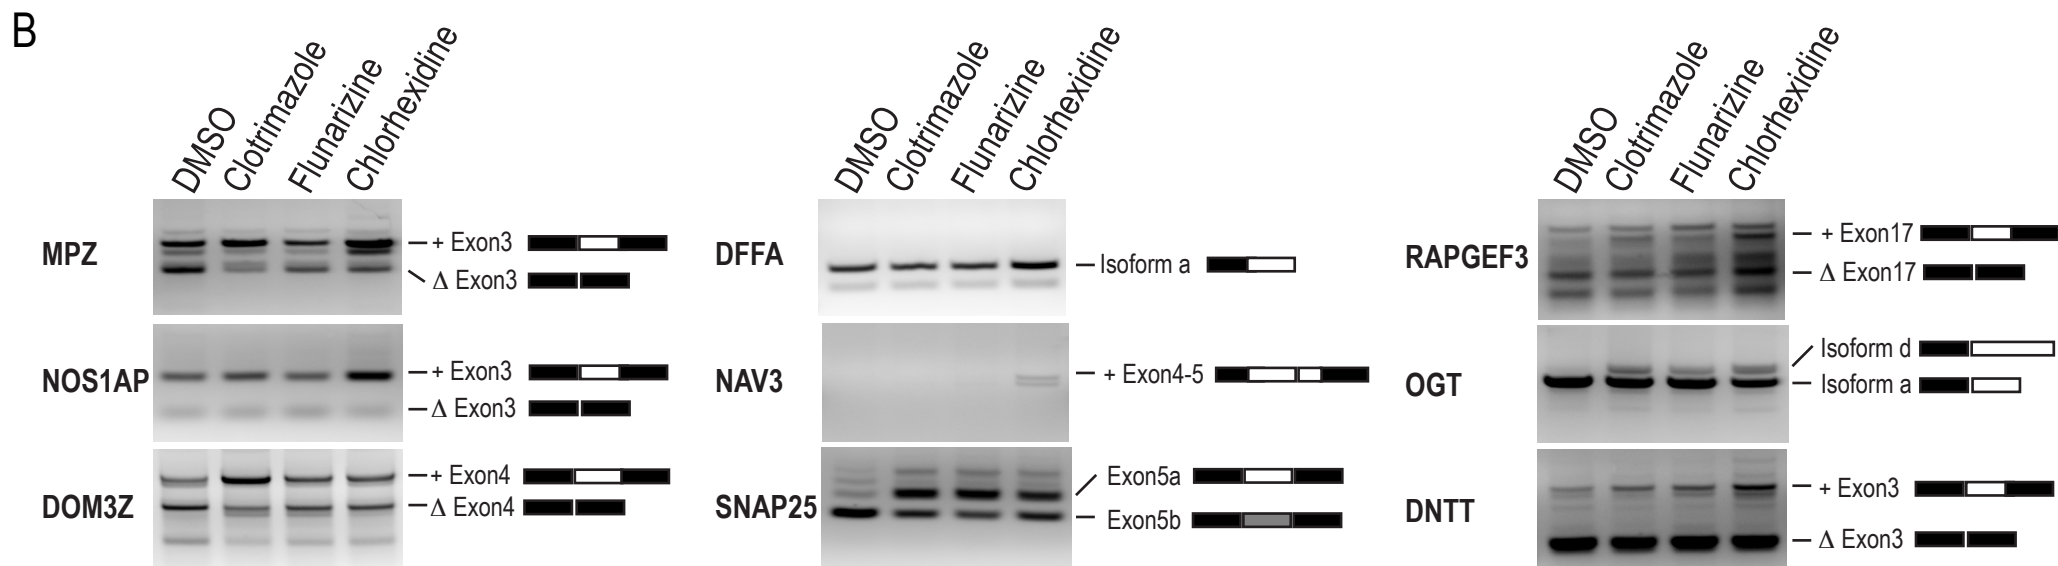

**Supplementary Figure 2. Confirmation of exon array. A. Real-time PCR for a select number of exons identified by exon array.**

**B. RT-PCR confirmation of alternative splicing events identified by exon array. C. Cell type specificity of chlorhexidine on NOS1AP and OGT.**

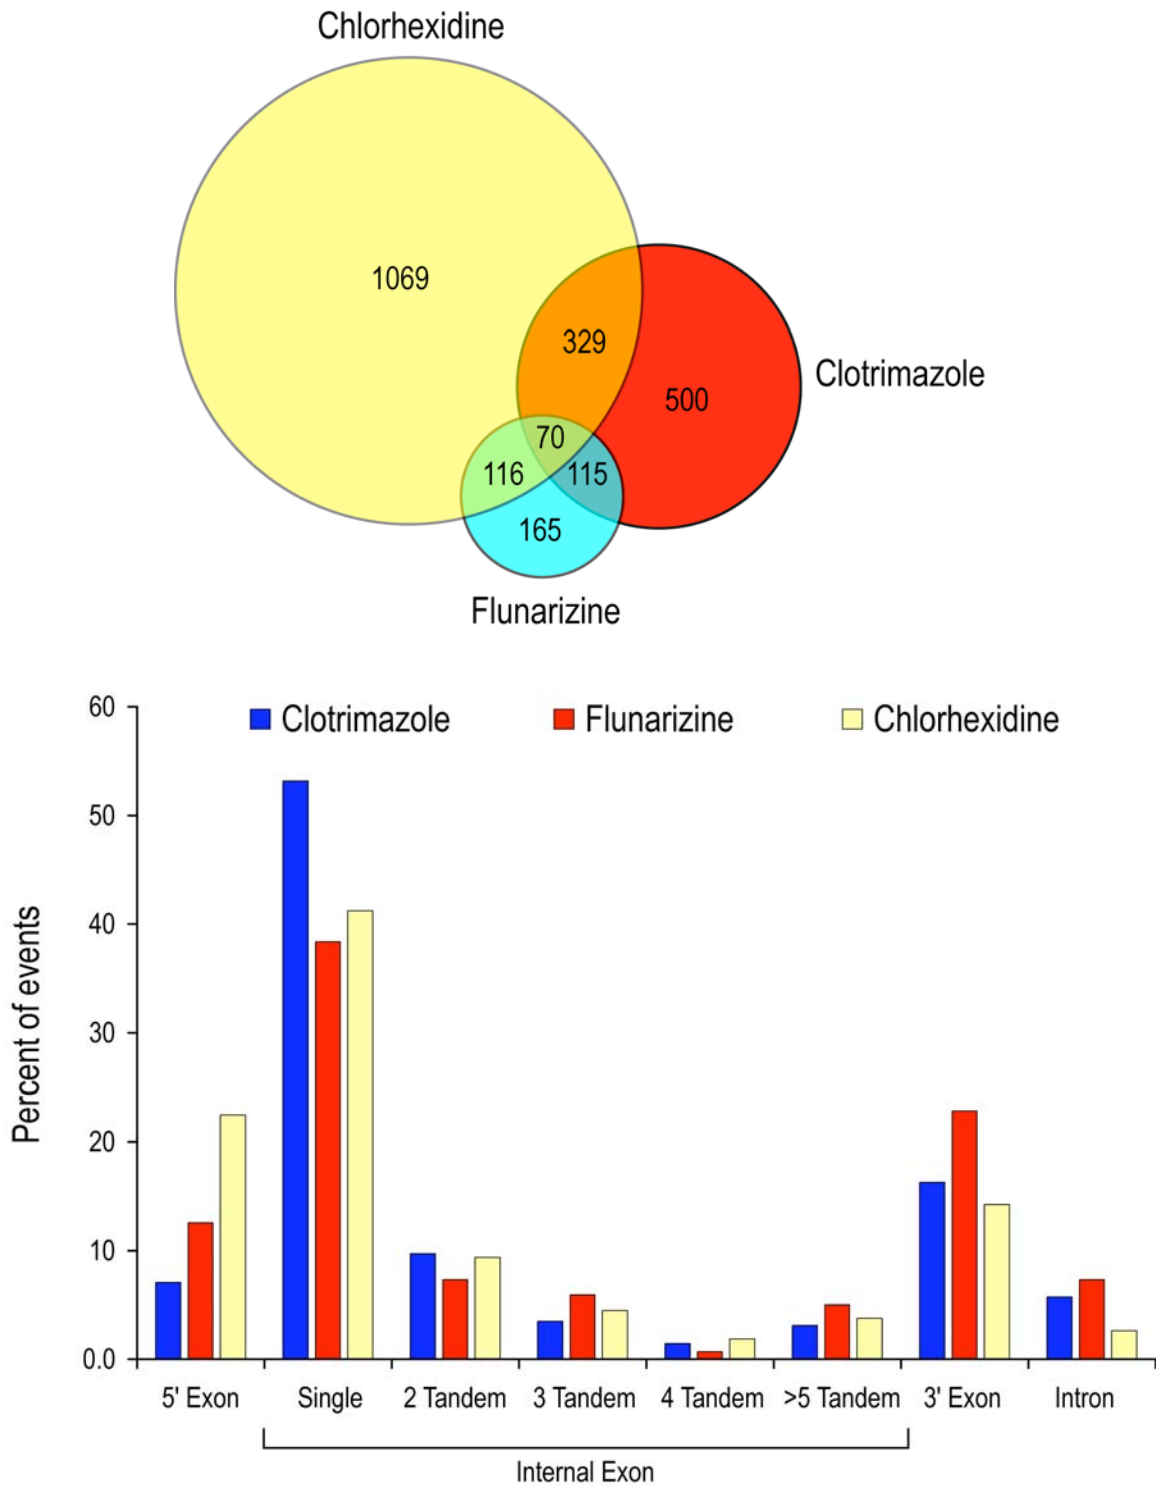

Supplementary Figure 3: Regulation of alternative splicing by the three compounds. Venn diagram of the affected transcripts from the exon arrays. Breakdown of the splicing modulators-mediated alternative splicing events identified by exon arrays.

Supplementary Table 1: Summary of the exon array for splicing inhibitors (all analyses were performed with FDR <0.01)

|               | Total transcripts analyzed | Transcript level changes | Alternative splicing changes |
|---------------|----------------------------|--------------------------|------------------------------|
| Chlorhexidine | 17867                      | 191                      | 1444                         |
| Clotrimazole  | 17859                      | <5                       | 874                          |
| Flunarizine   | 17868                      | <5                       | 326                          |

Supplementary Table 2: primers used for RT-PCR

|                           |                              |
|---------------------------|------------------------------|
| Coilin exon2F             | GCTCAAATGGTGGTGGACAGG        |
| Coilin exon3R             | GCAGCTGCTAACAGTGGTAACAGAC    |
| RON exon10F               | TGTGAGAGGCAGCTTCC            |
| RON exon12R               | TAGCTGCTTCCTCCGCC            |
| Casp9 exon2F              | GCTCTTCCTTTGTTTCATCTCC       |
| Casp9 exon7R              | CATCTGGCTCGGGGTTACTGC        |
| Coilin unsplicedF         | TGTGTGGAGTTCATGTCATGGA       |
| Coilin unsplicedR         | TGGGTGTCTCTACTGGATTCTGAAA    |
| CCDC56 exon1-2 unsplicedF | CCTGGTGTGGCTATTTGTATCC       |
| CCDC56 exon1-2 unsplicedR | GCCCTCTTGACACTCTGTTC         |
| ILF2 exon4-5 unsplicedF   | AGGCCTTGCTGAAGAGGAATC        |
| ILF2 exon4-5 unsplicedR   | GACATTTCTGGAAGACAGCCAAA      |
| ILF2 exon5-6 unsplicedF   | GATTGTGGCTCCAGGGACAT         |
| ILF2 exon5-6 unsplicedR   | AAGCTGCCCTTTCCTAAACTAAAT     |
| IK exon14-15 unsplicedF   | GGGAAGGCACAGAATCATATCC       |
| IK exon14-15 unsplicedR   | AAATTCAGCGTAAAAGGGAAGGA      |
| DIAPH1 int11 F            | CCCTGATCCCTGTGTGGAAT         |
| DIAPH1 int11 R            | GACACATAAGCCTGATGCTCTGTT     |
| CK1A1 int1 F              | CGAACCTCGTCCGCTGTCT          |
| CK1A1 int1 R              | GTCCCCCAACCTTTCTATCG         |
| EIF3D int1 F              | GAGACTCGTTGTCTTGGTATTATGATGT |
| EIF3D int1 R              | GCAGCAGCCCGCAAAG             |
| ERBB2IP int16 F           | TTATTTGCCCTTATACAAAGCTTAGCT  |
| ERBB2IP int16 R           | TGTCTCACATACCAAGAGCCATATTT   |
| ETF1 int10 F              | GCTTCCGGTGAGGTGCTTATT        |

|                |                               |
|----------------|-------------------------------|
| ETF1 int10 R   | TGCACCTGCTGCGTCAA             |
| ETF1 int2 F    | CGCATGGCCGGATGAG              |
| ETF1 int2 R    | AGATCCAGAAGGCGGGAGTT          |
| FGF18 int1 F   | CTGACTCTTCGACTGCGTGTCT        |
| FGF18 int1 R   | GTAAACACCTGCGGGAAACAG         |
| Gemin3 int1 F  | GGCGTGTTCTCATACGTTTTTG        |
| Gemin3 int1 R  | GGGTCTCCTGAGATTCCCCTAGT       |
| hnRNP M int7 F | CGTGGAATAGGCACTGTTACTTTTG     |
| hnRNP M int7 R | ATTCCTGCAGAAGGATACATATAGCTT   |
| hnRNP M int8 F | CACGTCAAGATGGTAAGTCAGTAGGA    |
| hnRNP M int8 R | CAACATACTGCACCCTATTTAACTTAGAC |
| MTRR int1 F    | TCGAGCCGATCATCTGATTTC         |
| MTRR int1 R    | TCAAATTAAGGAGAGTGTACGAATGAA   |
| NR3C1 int1 F   | CAGTGAGCGGCAGGATGAA           |
| NR3C1 int1 R   | TGCACAGCTGAGGGCAAA            |
| NR3C1 int2 F   | TGCTAAAGCAATGCAGTGAACA        |
| NR3C1 int2 R   | GCAAGAACCCTGTGAGCAAGA         |
| NOP2 int16 F   | TGGTCAGCCAGATGGTCTGA          |
| NOP2 int16 R   | AGGGTCAAGTGGCTGGTAGGT         |
| POM121 int2 F  | TCTGAATGCTCTCAGTTGAATGG       |
| POM121 int2 R  | TGCCACAAGGAATTAAATGG          |
| PSMB2 int4 F   | TTTCCTCCCCTTGCCTAAGTG         |
| PSMB2 int4 R   | AGCACAAAAGCATCCCTGTGT         |
| RPL23 int1 F   | GACTGGATTAGGCCCTGGTTT         |
| RPL23 int1 R   | GCAATTACTCCTGCAAGGCATA        |
| ZNF622 int1 F  | AAATGATGAGGGAAGGTGGTTTAG      |

|                 |                            |
|-----------------|----------------------------|
| ZNF622 int1 R   | CCAAACCTGCTGGCCAGAT        |
| SRRM2 int8 F    | CCACCTTAGTGGGAGGGAGTT      |
| SRRM2 int8 R    | CTCACGTATCCCTCAACCCTTT     |
| SRRM2 int9 F    | TGCACAGACCATTTCGGAAGA      |
| SRRM2 int9 R    | TGCTTTAGCCTGTCAGCTCCTA     |
| BRWD2 int15 F   | CCGCCAGACCGTAGTCTCA        |
| BRWD2 int15 R   | AGACATGATGCTAATGGCACAAA    |
| DOCK5 int41 F   | AATGCCGAGAAGATGACCAGTAC    |
| DOCK5 int41 R   | CCCGGAAAGGATACACTGCTT      |
| TMEM1 int12 F   | CCTCTCCGCTCCAGCTACCT       |
| TMEM1 int12 R   | TGCTTGCGCTCCTCTTCAGT       |
| TMEM1 int16 F   | CCGAAGCCATGCTCATCCT        |
| TMEM1 int16 R   | CACCTCACCTCTCGTGTTGGA      |
| Caspase9 int3 F | GGAGAGCCCGGGTTTACG         |
| Caspase9 int3 R | GCAGAAGTTCACATTGTTGATAATGA |
| RON int10 F     | CACCCAGTGCCAACCTAGTTC      |
| RON int10 R     | CCCTATCCCTTACACTTACCTCAAAC |
| SMN int3 F      | CGAGATGATAGTTTGCCCTCTTC    |
| SMN int3 R      | TCCCCAACTTTCCACTACAAAAG    |
| DNAJB2 int9 F   | GAGCGGGTGGAAAGTGGAGGAGGAT  |
| DNAJB2 int9 R   | TCAGAGGATGAGGCAGCGAGAGGC   |
| TRA2Beta int1 F | GGTAGAGTTAGAGCCCGTGCGGAG   |
| TRA2Beta int1 R | GGCCTCCCTCCTTCACGACCAAAG   |

Supplementary Table 3. A list of 10 hits from the splicing screen that showed differential effect on Luc-I vs. Luc cells.

| Compound                            | Splicing Activity<br>% of control<br>(Luc-I/Luc) | Structure                                                                            |
|-------------------------------------|--------------------------------------------------|--------------------------------------------------------------------------------------|
| MELIACIN-1(2),14(15)-DIEN-3,7-DIONE | 83                                               | 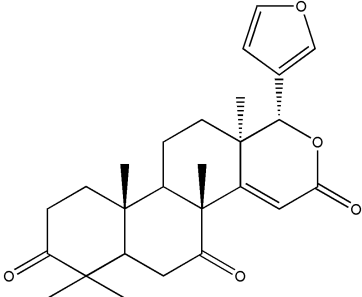   |
| M10H10                              | 86                                               |    |
| GBLD                                | 73                                               |   |
| Chem2A7                             | 69                                               |  |
| Thymoquinone                        | 76                                               |  |
| Quercetin                           | 81                                               |  |



Emicymarin

57

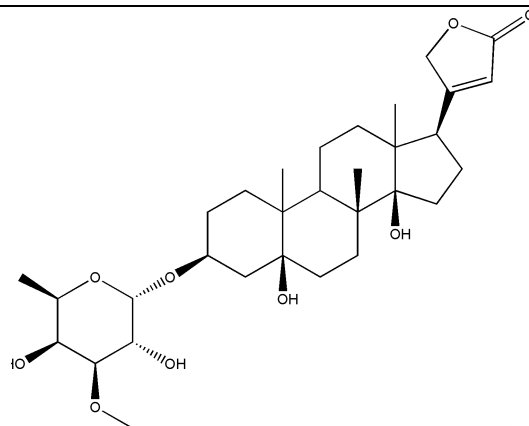

Strophanthidin

51

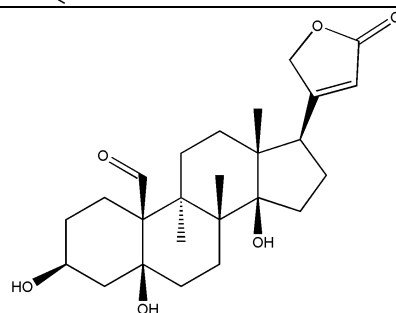

H-7

83

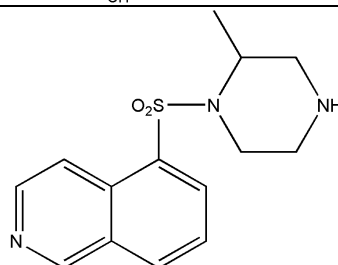

Isradipine

70

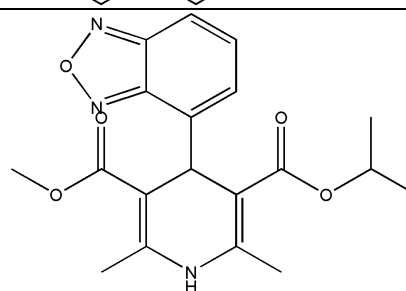

Supplement: supp_30_7_1718__1.pdf [file supp_30_7_1718__1.pdf]
